# Supplementary material for: BNN/TiO2 nanocomposite system–modified dental flow resins and the mechanism of the enhancement of mechanical and antibacterial properties
Source: Royal Society of Chemistry journal article supplement (doi:10.1039/d2bm01848a), 2023-01-01

### Supplementary file

Fig. S1. The energy changes and the convergence of optimized structures of BNN.

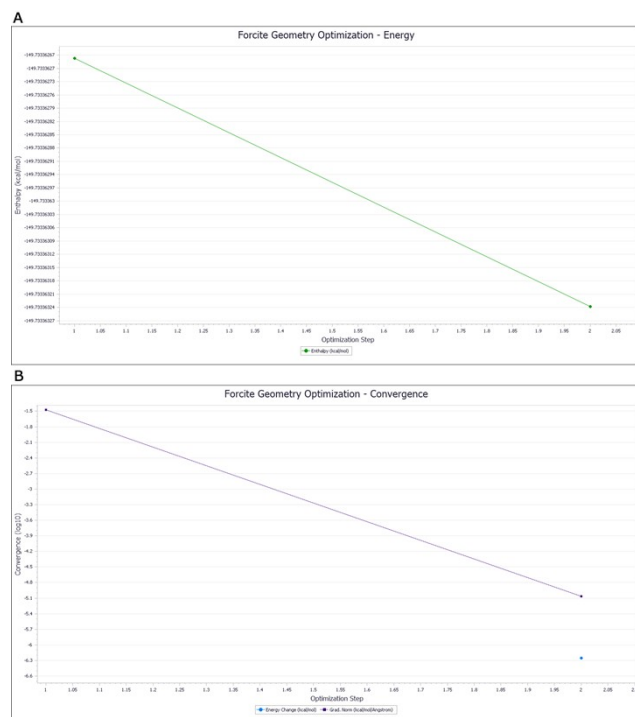

Fig. S2. The energy changes and the convergence of optimized structures of  $\text{TiO}_2$ .

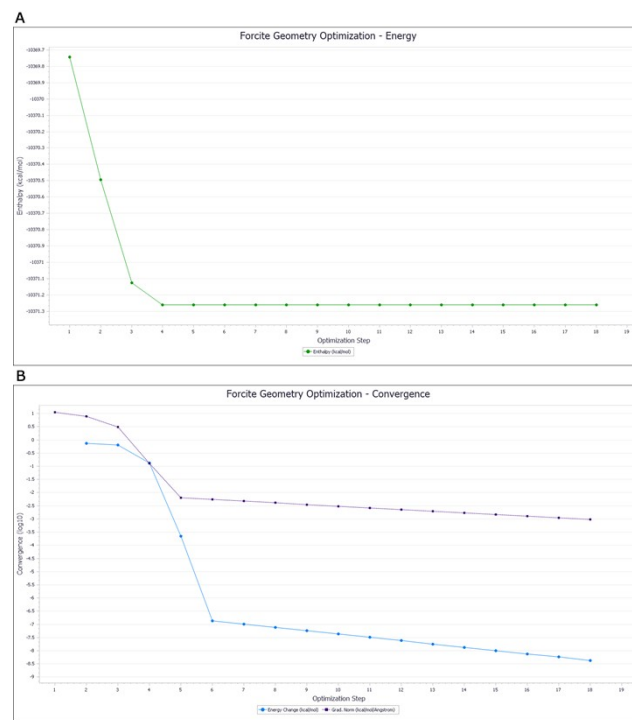

Fig. S3. The energy and temperature changes of optimized structures of layers.

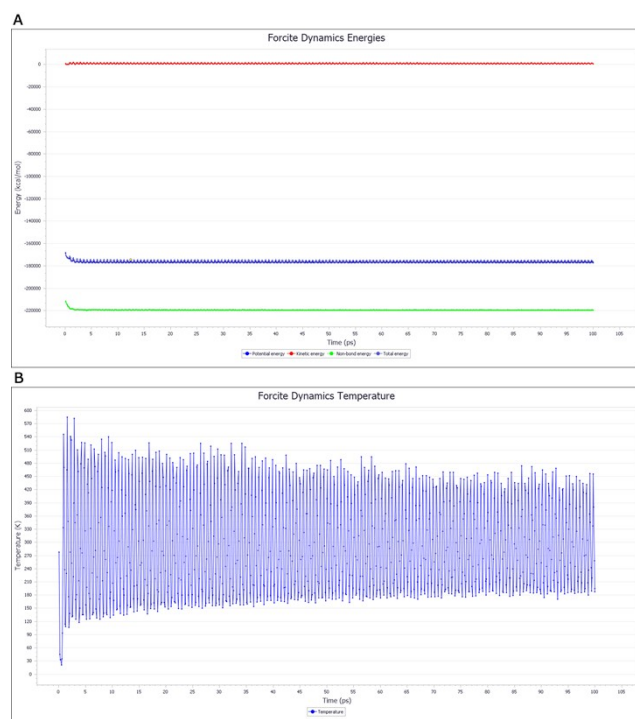

Fig. S4. EDS mapping analysis of O (A) and the overlapping map of N, B, O (B) corresponding to Fig.2B.

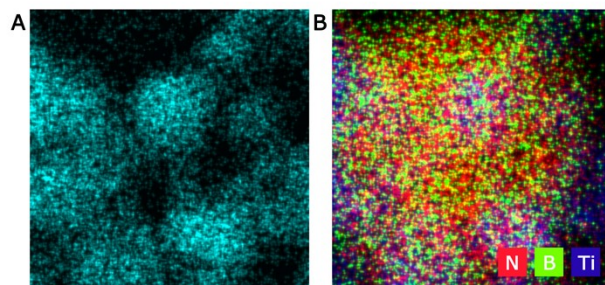

Fig. S5. Water absorption rates of modified flow resin for 7 d, 14 d, 21 d, 28 d.

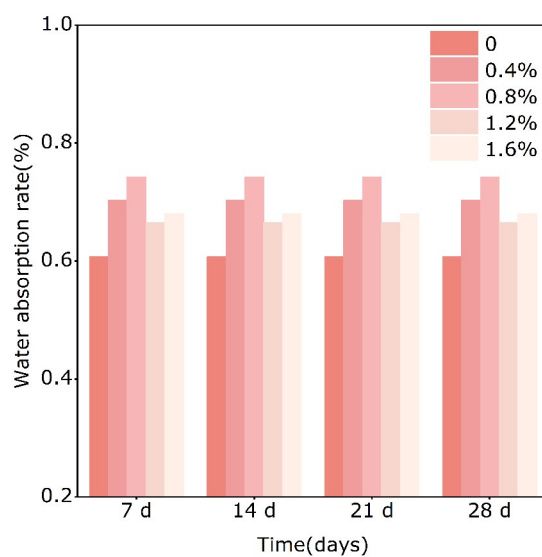

Table. S1. Dissolution rates of modified flow resin for 7 d, 14 d, 21 d, 28 d.

| Groups(BNNs/TiO <sub>2</sub> wt%) | Solubility (%) |      |      |      |
|-----------------------------------|----------------|------|------|------|
|                                   | 7 d            | 14 d | 21 d | 28 d |
| 0                                 | 0              | 0    | 0    | 0    |
| 0.4                               | 0              | 0    | 0    | 0    |
| 0.8                               | 0              | 0    | 0    | 0    |
| 1.2                               | 0              | 0    | 0    | 0    |
| 1.6                               | 0              | 0    | 0    | 0    |

Fig. S6. Cell survival rate.

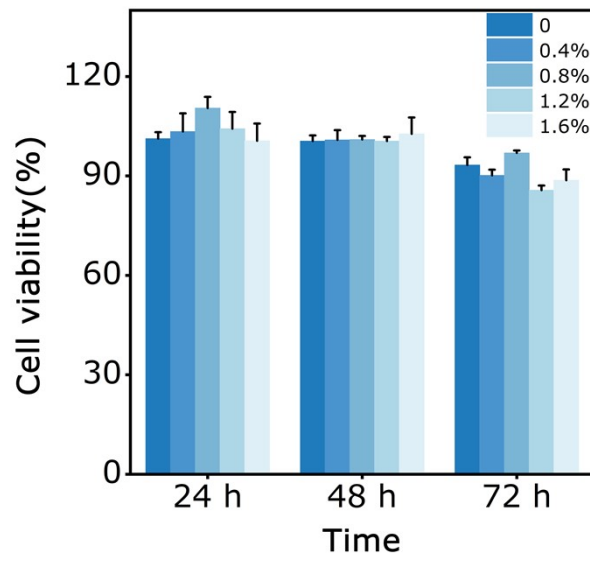

Supplement: d2bm01848a1.pdf [file d2bm01848a1.pdf]
